# Supplementary material for: A Zn–nitrite battery as an energy-output electrocatalytic system for high-efficiency ammonia synthesis using carbon-doped cobalt oxide nanotubes
Source: Royal Society of Chemistry journal article supplement (doi:10.1039/d2ee00686c), 2022-01-01
Supplement: d2ee00686c1.pdf [file d2ee00686c1.pdf]

## Electronic Supplementary Information

### **A Zn-nitrite battery as an energy-output electrocatalytic system for high-efficiency ammonia synthesis by carbon-doped cobalt oxide nanotubes**

Rong Zhang,<sup>1</sup> Shaoce Zhang,<sup>1</sup> Ying Guo,<sup>1</sup> Chuan Li,<sup>1</sup> Jiahua Liu,<sup>1</sup> Zhaodong Huang,<sup>1</sup>  
Yuwei Zhao,<sup>1</sup> Yangyang Li,<sup>1</sup> Chunyi Zhi<sup>1,2\*</sup>

<sup>1</sup>Department of Materials Science and Engineering, City University of Hong Kong, 83  
Tat Chee Avenue, Kowloon, Hong Kong 999077, Hong Kong

<sup>2</sup>Centre for Functional Photonics, City University of Hong Kong, Kowloon, Hong Kong

Corresponding author: Prof. Chunyi Zhi

Email: cy.zhi@cityu.edu.hk

## S1. Experiment section

### Chemicals

Potassium sulfate ( $\text{K}_2\text{SO}_4$ , 99%), potassium nitrite ( $\text{KNO}_2$ , 99.99%), hydrazine monohydrate ( $\text{N}_2\text{H}_4\cdot\text{H}_2\text{O}$ , > 98%), Deuterium oxide ( $\text{D}_2\text{O}$ , 99.9 atom % D), hydrochloric acid ( $\text{HCl}$ , 37%), sodium hydroxide ( $\text{NaOH}$ , > 98%), cobalt chloride hexahydrate ( $\text{CoCl}_2\cdot 6\text{H}_2\text{O}$ , > 99%), sodium oxalate ( $\text{Na}_2\text{C}_2\text{O}_4$ , 99%), hydrogen peroxide ( $\text{H}_2\text{O}_2$ , 30%), sodium hypochlorite solution ( $\text{NaClO}$ , available chlorine 4.0 %), p-Dimethylaminobenzaldehyde ( $\text{C}_9\text{H}_{11}\text{NO}$ ), salicylic acid ( $\text{C}_7\text{H}_6\text{O}_3$ , 99%), ethanol ( $\text{C}_2\text{H}_5\text{OH}$ , 99.7%), polyvinyl pyrrolidone (PVP), trisodium citrate ( $\text{C}_6\text{H}_5\text{Na}_3\text{O}_7$ , 98%), sodium nitroferricyanide dehydrate ( $\text{C}_5\text{FeN}_6\text{Na}_2\text{O}\cdot 2\text{H}_2\text{O}$ , 99%), ethylene glycol ( $\text{C}_2\text{H}_8\text{O}_2$ , 99%) were purchased from Shanghai Macklin Biochemical Co., Ltd. W1S1005 carbon cloth (CC) was purchased from Fuel Cell Store Ltd. Bipolar membrane (Fumasep® FBM) was purchased from Fumatech GmbH. A commercial Nafion 117 membrane and typical Nafion solution (5 wt.%) was purchased from DuPont™ (E. I. du Pont de Nemours and Company).

### Synthesis of the $\text{C}_2\text{O}_4^{2-}$ doped $\text{CoC}_2\text{O}_4$ precursor

Typically, 2 mmol of  $\text{CoCl}_2\cdot 6\text{H}_2\text{O}$  and 8 mmol of  $\text{Na}_2\text{C}_2\text{O}_4$  were dissolved in 40 mL of ethylene glycol to form a homogeneous solution under continuous magnetic stirring. The solution was then transferred to a 50 mL Teflon-lined autoclave. The reactor was sealed and kept at 200 °C for 16 h in the oven. After the reaction was completed, the

pink-colored precipitate was collected by centrifugation, washed with deionized water and ethanol for several times, and dried in a vacuum oven at 60 °C for 12 h.

### **Synthesis of the Co<sub>3</sub>O<sub>4</sub> and C/Co<sub>3</sub>O<sub>4</sub>**

Briefly, 2 g of PVP ( $M_w = 1\,300\,000$ ) was added into 30 mL of ethanol. After 1 h stirring, 0.4 g of the obtained C<sub>2</sub>O<sub>4</sub><sup>2-</sup> doped CoC<sub>2</sub>O<sub>4</sub> was dispersed into the above solution. After 12 h stirring, the C<sub>2</sub>O<sub>4</sub><sup>2-</sup> doped CoC<sub>2</sub>O<sub>4</sub>/PVP complex was harvested by centrifugation and dried at 60 °C for 12 h. To obtain C/Co<sub>3</sub>O<sub>4</sub>, the C<sub>2</sub>O<sub>4</sub><sup>2-</sup> doped CoC<sub>2</sub>O<sub>4</sub>/PVP complex was transferred into a box furnace and annealed in air at 400 °C for 2 h with a heating rate of 2 °C min<sup>-1</sup>. Undoped Co<sub>3</sub>O<sub>4</sub> was prepared by calcinating C<sub>2</sub>O<sub>4</sub><sup>2-</sup> doped CoC<sub>2</sub>O<sub>4</sub> nanorods directly in air at 400 °C for 2 h.

### **Characterization**

The crystalline, morphologies and microstructures of samples were investigated by XRD using a Bruker D2 Phaser diffractometer with Cu K $\alpha$  irradiation ( $\lambda = 1.54\text{ \AA}$ ), field-emission scanning electron microscopy (FEI Quanta 450 FEG) and JEOL-2001F field-emission TEM (JEOL-2001F). The surficial chemical states and compositions of the as-obtained products were investigated by XPS (ESCALB 250) with an Al K $\alpha$  X-ray beam ( $E = 1486.6\text{ eV}$ ). <sup>1</sup>H-NMR measurements were performed on Bruker 400MHz ASCEND AVANCE III HD Nuclear Magnetic Resonance System (NMR-400). UV-Vis spectroscopy measurements were carried out using a UV/Vis Spectrometer DB-20. FTIR measurements were carried out using Spectrum Two FTIR Spectrometers by PerkinElmer. KPFM experimental results were obtained by Bruker Dimension Icon.

## Computational Details

All the computations were conducted based on the density functional theory (DFT) using the Cambridge Sequential Total Energy Package (CASTEP) code of the Materials Studio 2018 software. The generalized gradient approximation (GGA) with the Perdew-Burke-Ernzerhof (PBE) functional were used to describe the electronic exchange and correlation effects. The kinetic-energy cutoff was set as 500 eV. The geometry optimization within the conjugate gradient method was performed with forces on each atom less than 0.05 eV/Å. An energy tolerance is  $5.0 \times 10^{-6}$  eV per atom, and a maximum displacement of 0.001 Å was considered. A  $\text{Co}_3\text{O}_4$  (311) surface with a three-layer model of the crystal plane composed of 54 atoms was used for calculation with a sufficient vacuum gap of 15 Å. Bottom atomic Co-O layer was fixed while other layers and the adsorbates were fully relaxed during structural optimizations. The free energies for each reaction were given after correction:  $\Delta G = \Delta E - T\Delta S$ . Where  $\Delta E$  is the reaction energy obtained by the difference between reactants and products;  $\Delta S$  is the change in entropy for each reaction. Entropy values are taken from the standard database in the NIST webbook (J. Phys. Chem. Ref. Data 1996, 25, 551- 603.). The entropies of adsorbate and adsorption site are negligible.

## Electrochemical measurements

Before the  $\text{NO}_2$ -RR tests, the Nafion 117 membrane was pretreated in 5 wt%  $\text{H}_2\text{O}_2$  aqueous solution at 80 °C for 1 h and then in ultrapure water at 80 °C for another 1 h. All electrochemical measurements were carried out in the argon atmosphere. The CC-supported catalysts ( $1 \times 1 \text{ cm}^2$ ), Ag/AgCl (3 M KCl), and graphite rod were used as the

work electrode, the reference electrode and the counter electrode, respectively. For the preparation of the working electrode, 10 mg of samples was dispersed in 0.95 mL of isopropyl alcohol and 50  $\mu\text{L}$  of 0.25% Nafion solution. The mixed solution was sonicated for 30 min to form a homogeneous ink. 50  $\mu\text{L}$  of the catalyst ink was drop cast onto CC ( $1 \times 1 \text{ cm}^2$ ) and dried at room temperature with a loading mass of 0.5  $\text{mg}/\text{cm}^2$ . All electrochemical tests were carried out at ambient conditions. LSV tests were conducted with the scan rate of 5 mV/s in the three-electrode system. The chronoamperometry tests were conducted at a series of applied potentials in a typical H-type cell that contains 50-mL electrolyte separated by a membrane (Nafion 117) on the electrochemical workstation (CHI 760E, Chenhua, China). All potentials in this work refer to RHE,  $E(\text{RHE}) = E(\text{Ag}/\text{AgCl}) + 0.222 + 0.059\text{pH}$ . Different sweep rates in cyclic voltammetry measurements were performed and a linear relation was demonstrated on the basis of the current densities ( $J_{\text{anodic}} - J_{\text{cathodic}}$ ) at the midpoint of the sweep voltage interval against scan rate. The  $C_{\text{dl}}$  was then obtained by halving the slope and the ECSA could be calculated by the following formula:  $\text{ECSA} = (C_{\text{dl}}/C_s) \times S$  in which  $C_s$  and  $S$  respectively represent the specific capacitance ( $0.04 \text{ mF cm}^{-2}$ ) and the area of electrode ( $1 \text{ cm}^2$ ).

#### **Assembly of the $\text{Zn-NO}_2^-$ battery and electrochemical test.**

The CC-supported catalysts ( $1 \text{ cm}^2$ ) and Zn plate ( $1 \text{ cm}^2$ ) were employed as the cathode for zinc-nitrate battery. A typical H-type cell that contains 20-mL cathode electrolyte ( $0.5 \text{ M K}_2\text{SO}_4 + 50 \text{ mM KNO}_2$ ) and 20-mL anode electrolyte ( $1 \text{ M KOH}$ ). Considering our  $\text{Zn-NO}_2^-$  battery has an alkali anodic electrolyte and a neutral cathodic electrolyte,

a bipolar membrane consisting of an anion exchange layer and a cation exchange layer is used in the Zn-nitrite battery, where  $\text{H}^+$  and  $\text{OH}^-$  are carriers at the cathode and anode, respectively.  $\text{H}^+$  and  $\text{OH}^-$  ions migrate along the electric field to the corresponding electrodes and are consumed. The discharging polarization curves with a scan rate of 5 mV/s and galvanostatic tests were conducted using a CHI 760E workstation and Land 2001A battery test system at room temperature, respectively. After electrochemical test, the electrolyte was diluted for the next detection.

The power density ( $P$ ) of zinc-nitrate battery was determined by  $P = I \times V$ , where  $I$  and  $V$  are the discharge current density and voltage, respectively.

The electrochemical reactions in Zn-nitrite battery are presented as following:

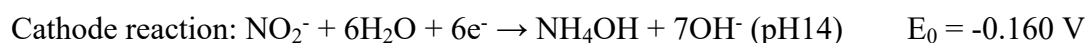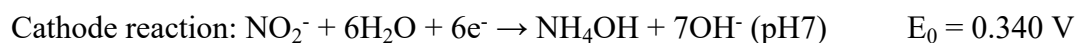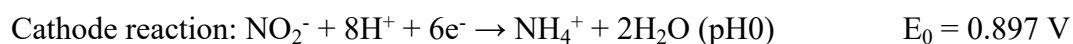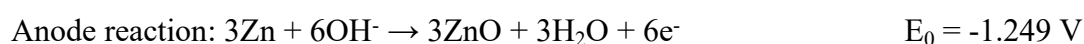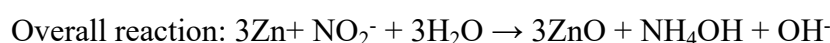

$$E_{\text{Zn-nitrite battery}} = 1.089 \text{ V} \quad \text{pH14}$$

$$E_{\text{Zn-nitrite battery}} = 1.589 \text{ V} \quad \text{pH7}$$

$$E_{\text{Zn-nitrite battery}} = 2.146 \text{ V} \quad \text{pH0}$$

Though the Zn- $\text{NO}_2^-$  battery system can simultaneously realize the  $\text{NH}_3$  synthesis and electricity supply, the Zn dissolution and depletion of  $\text{NO}_2^-$  in the electrolyte will make the battery system less robust. To overcome the first problem, we can design a rechargeable Zn- $\text{NO}_2^-$  battery to recycle Zn in the anodic chamber. However, the

oxygen evolution reaction ( $4\text{OH}^- \rightarrow \text{O}_2 + 2\text{H}_2\text{O} + 4\text{e}^-$ ) and nitrite oxidation reaction ( $\text{NO}_2^- + 2\text{OH}^- \rightarrow \text{NO}_3^- + \text{H}_2\text{O} + \text{e}^-$ ) may simultaneously occur in the cathode. The generated  $\text{NO}_3^-$  can then be reduced to  $\text{NH}_3$  over the  $\text{C}/\text{Co}_3\text{O}_4$  when discharging. Therefore, a selective electrocatalyst should be rationally designed. For the second problem, the flow system with continuously stirring can be introduced a steady  $\text{NO}_2^-$  concentration and a steady current density. Future research should be focused on designing and preparing efficient and selective electrocatalysts applied in a flow Zn- $\text{NO}_2^-$  battery system.

### **Determination of ammonia**

The amount of the produced  $\text{NH}_3$  was detected with the indophenol blue method. To minimize the experimental error in quantification of ammonia, all data was recorded three times to obtain the error bar. In detail, a certain amount of electrolyte was taken out after  $\text{NO}_2^-$ -RR test and diluted with electrolyte, and 1.25 mL of solution containing 0.625 M NaOH, 0.36 M salicylic acid and 0.17 M sodium citrate was added. Then 150  $\mu\text{L}$  sodium nitroferricyanide solution (10 mg/mL) and 75  $\mu\text{L}$  NaClO (available chlorine 4.0 wt%) solution were added. After 2 h under ambient conduction, UV-Vis absorption spectrum was recorded, and the absorbance value was obtained at the wavelength of 658 nm. The standard  $\text{NH}_4^+$  solutions with the given concentrations of  $(\text{NH}_4)_2\text{SO}_4$  in 0.5 M  $\text{K}_2\text{SO}_4$  were prepared for building the calibration curve. The amount of the produced  $\text{NH}_3$  was also determined by  $^1\text{H}$  NMR. The pH value of the electrolyte after  $\text{NO}_2^-$ -RR test was adjusted by 2 mol/L  $\text{H}_2\text{SO}_4$  to achieve a weak acid. Then, 400 ppm of  $\text{C}_4\text{H}_4\text{O}_4$  was added into the solution for a quantitative determination. Subsequently,

adding 50  $\mu\text{L}$   $\text{D}_2\text{O}$  into 0.5 mL of above mixture for NMR detection. Finally, the peak area ratio of  $\text{NH}_4^+$  and  $\text{C}_4\text{H}_4\text{O}_4$  was recorded and the concentration could be determined according to the standard calibration curves. The calibration curve was obtained by collecting the peak area ratios of  $\text{NH}_4^+$  with given various concentrations and  $\text{C}_4\text{H}_4\text{O}_4$  in 0.5 M  $\text{K}_2\text{SO}_4$

### **Determination of hydrazine**

Hydrazine in the electrolytes was also detected by the Watt-Chrisp method. A mixture of ethanol (100 mL), para(dimethylamino) benzaldehyde (2.0 g) and HCl (concentrated, 12 mL) were used as a color reagent. 2-mL color reagent was added into 2-mL of diluted electrolyte. After 30 min, the absorbance was measured at a wavelength of 458 nm. The standard hydrazine monohydrate solutions with the given concentrations of hydrazine in 0.5 M  $\text{K}_2\text{SO}_4$  were also prepared for building the calibration curves.

### **Faradaic efficiency and ammonia yield rate**

FEs and area-normalized yield rates of  $\text{NH}_3$ ,  $\text{NO}_2^-$ , and  $\text{N}_2\text{H}_4$  were calculated:

$$\text{FE}(\text{NH}_3) = (6F \times C \times V \times n) / Q$$

$$\text{Yield rate}(\text{NH}_3) = (C \times V \times n) / (t \times A)$$

$$\text{FE}(\text{N}_2\text{H}_4) = (12F \times C \times V \times n) / Q$$

$$\text{Yield rate}(\text{N}_2\text{H}_4) = (C \times V \times n) / (t \times A)$$

Where  $F$  is the Faraday constant (96485 C/mol),  $C$  is the measured  $\text{NH}_3$  concentration,  $V$  is the volume of electrolyte,  $Q$  is the total charge passed through the electrode,  $n$  is the dilution factor and  $A$  is the geometric area of the working electrode ( $1 \times 1 \text{ cm}^2$ ).

## S2. Fig.s and tables

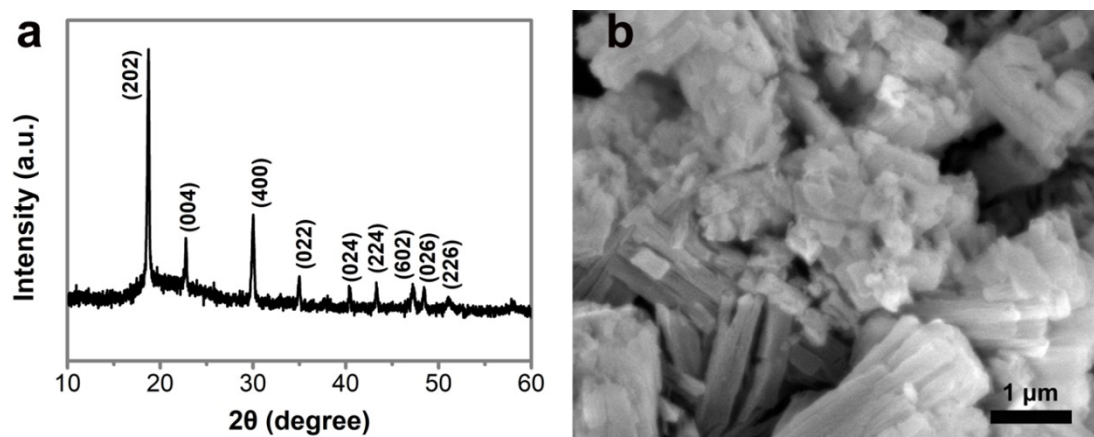

**Fig. S1.** XRD pattern and SEM image of  $\text{C}_2\text{O}_4^{2-}$ -doped  $\text{CoC}_2\text{O}_4$ .

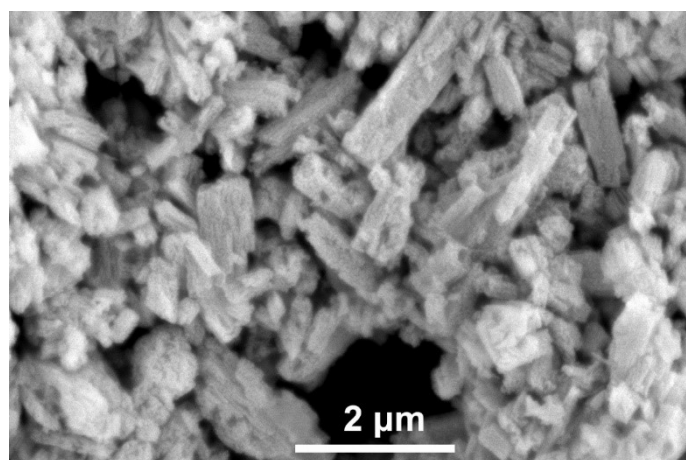

**Fig. S2.** SEM image of the  $\text{C}/\text{Co}_3\text{O}_4$ .

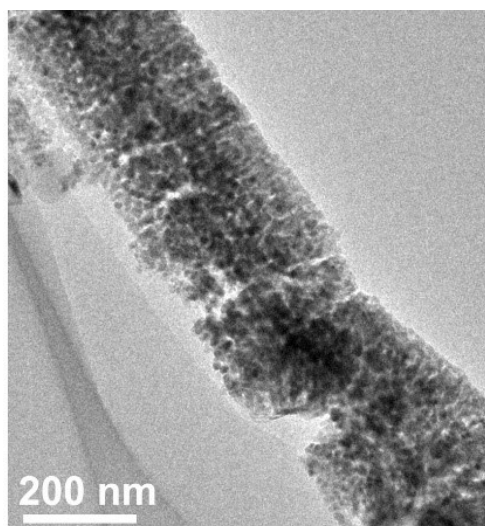

**Fig. S3.** TEM images of the  $\text{Co}_3\text{O}_4$ .

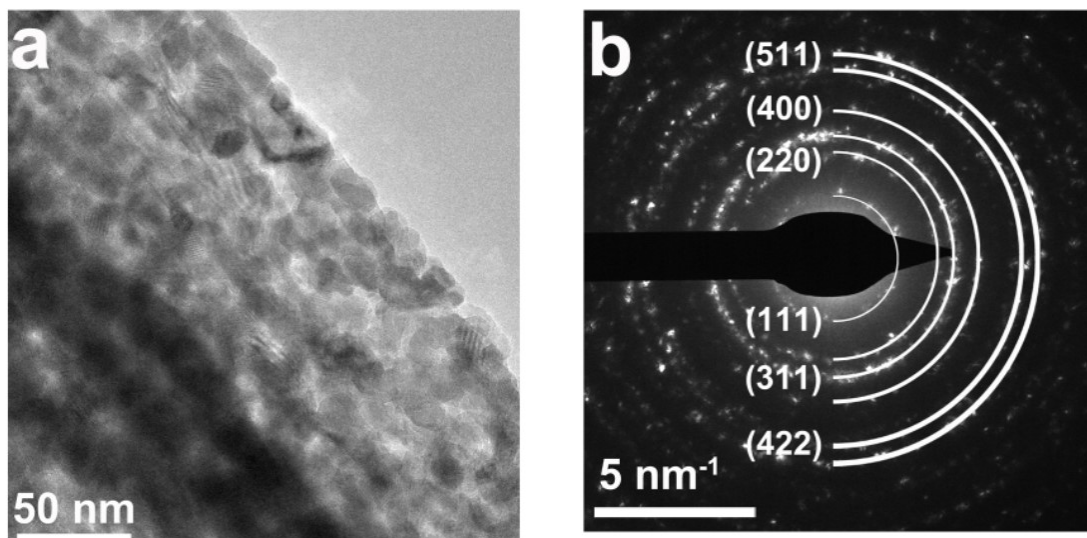

**Fig. S4.** (a) TEM images of the  $\text{C}/\text{Co}_3\text{O}_4$  shell. (b) SEAD pattern of the  $\text{C}/\text{Co}_3\text{O}_4$  nanocrystal.

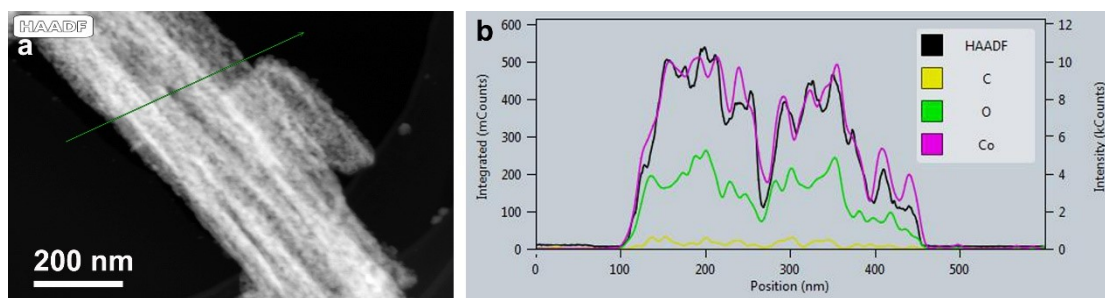

**Fig. S5.** EDS compositional line profile of C/Co<sub>3</sub>O<sub>4</sub>.

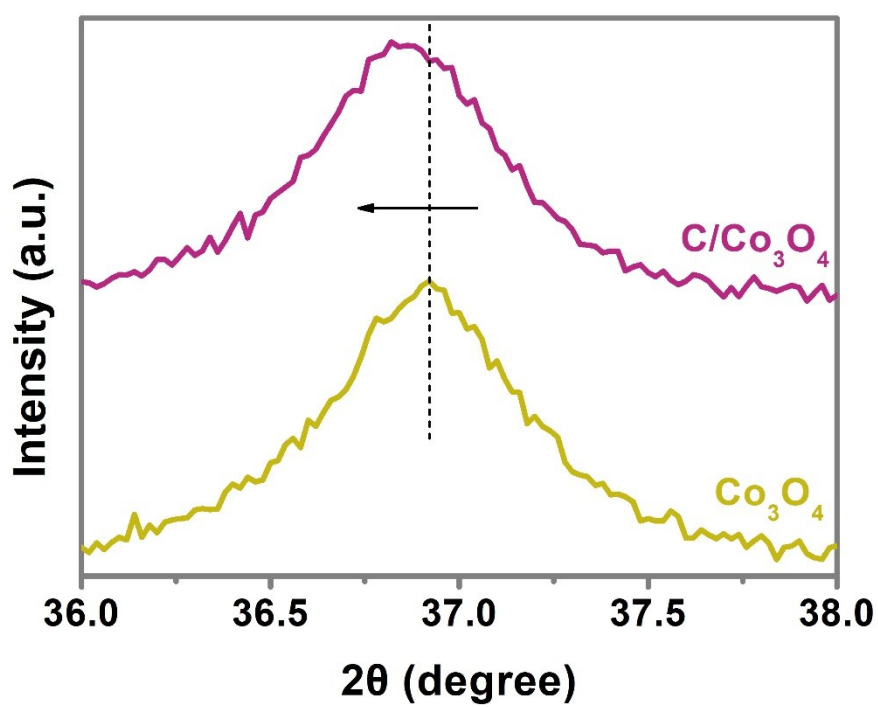

**Fig. S6.** Magnified view of the XRD patterns for doped and undoped Co<sub>3</sub>O<sub>4</sub>.

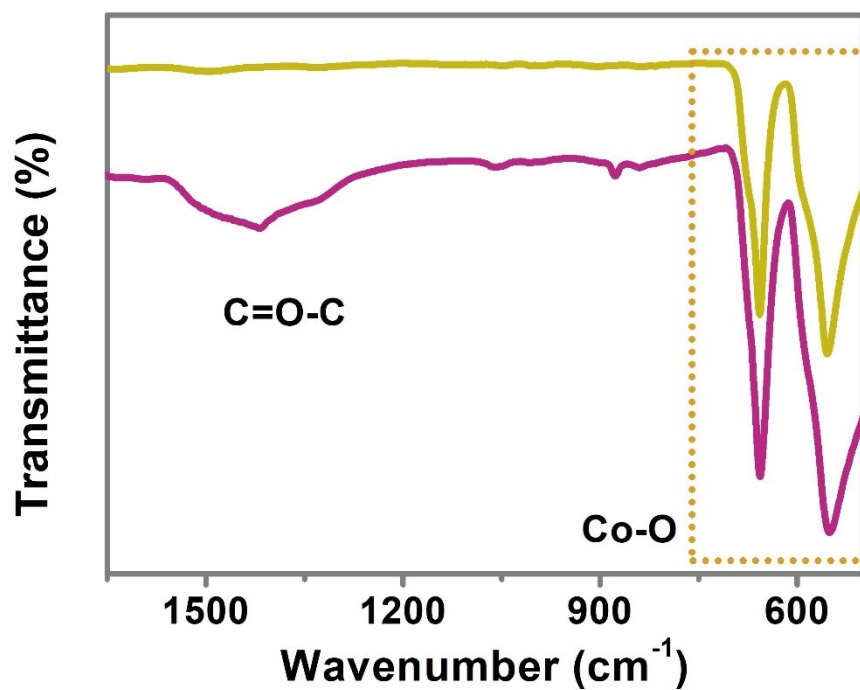

Fig. S7. FTIR spectra of the undoped Co<sub>3</sub>O<sub>4</sub> and C-doped Co<sub>3</sub>O<sub>4</sub>.

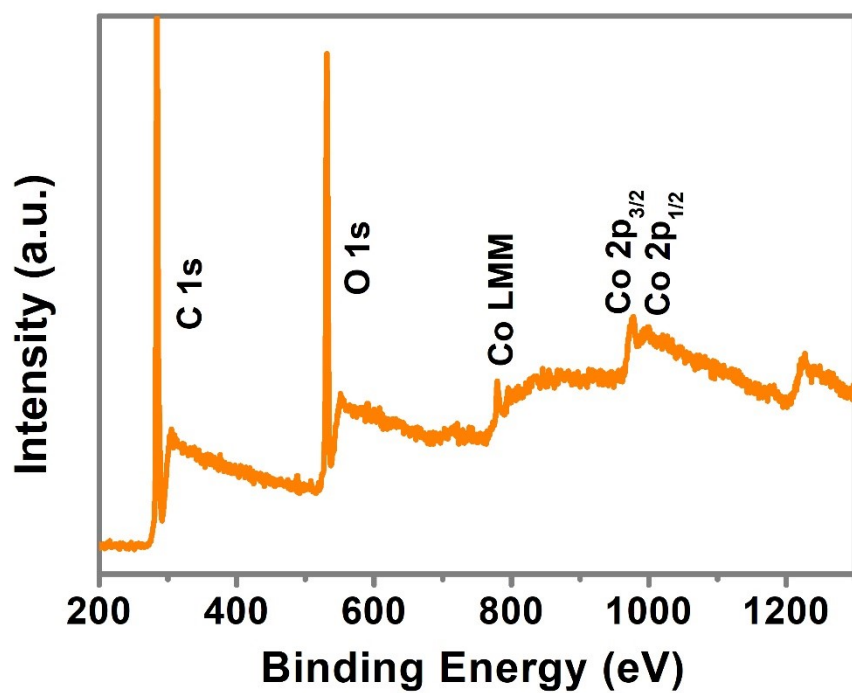

Fig. S8. XPS survey spectrum of the C/Co<sub>3</sub>O<sub>4</sub>.

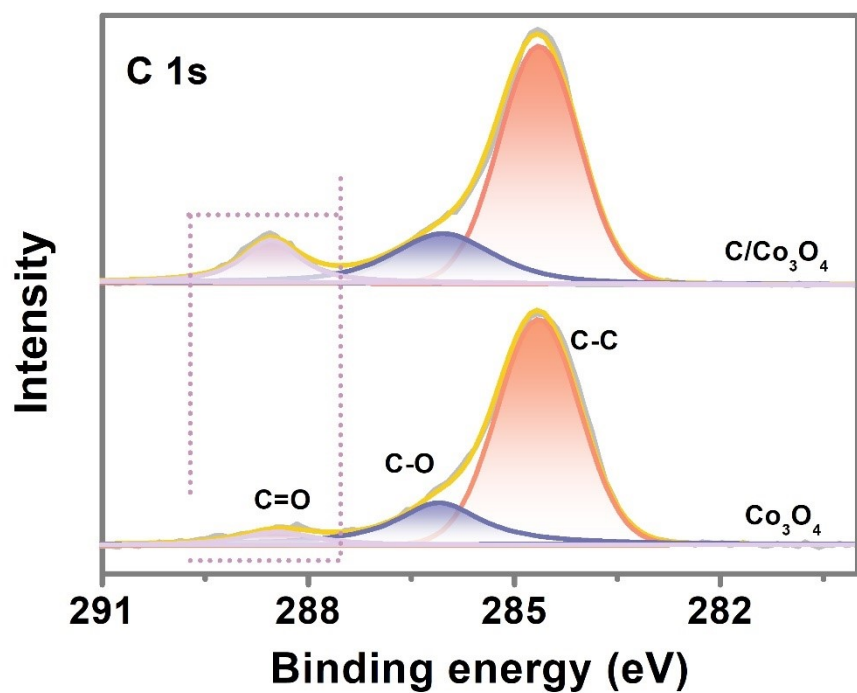

Fig. S9. XPS spectrum of the C/Co<sub>3</sub>O<sub>4</sub> and Co<sub>3</sub>O<sub>4</sub> in C 1s region.

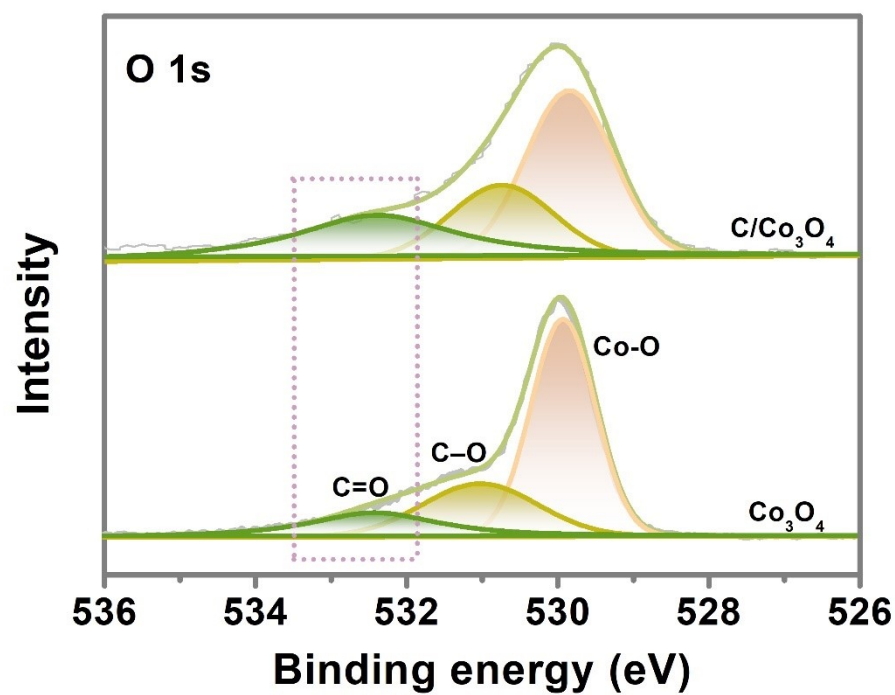

Fig. S10. XPS spectrum of the C/Co<sub>3</sub>O<sub>4</sub> and Co<sub>3</sub>O<sub>4</sub> in O 1s region.

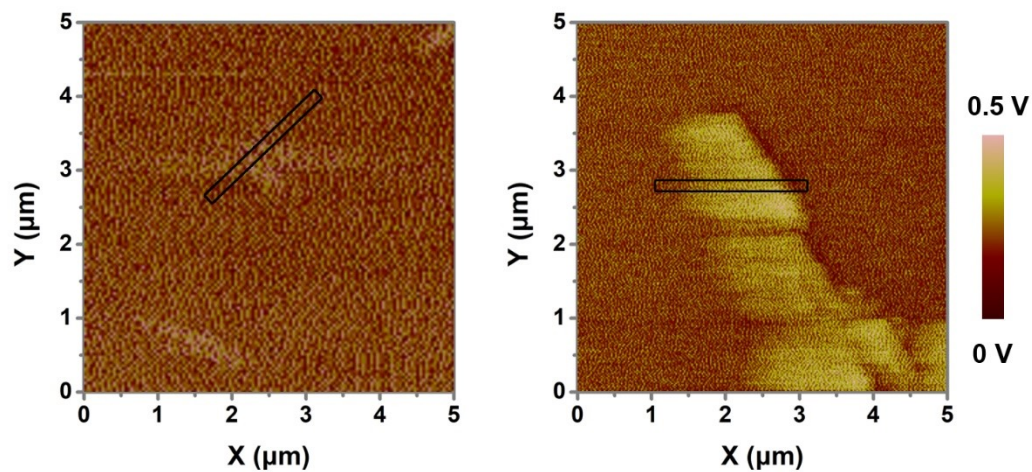

**Fig.**

**S11.** KPFM images of the  $\text{Co}_3\text{O}_4$  (left) and the  $\text{C}/\text{Co}_3\text{O}_4$  (right).

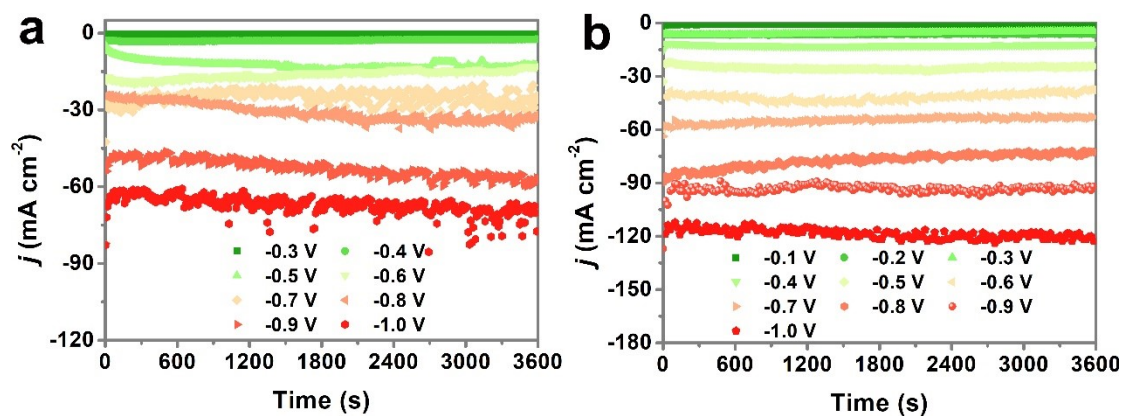

**Fig. S12.** Chronoamperometry curves of (a)  $\text{Co}_3\text{O}_4$  and (b)  $\text{C}/\text{Co}_3\text{O}_4$  in 0.5 M  $\text{K}_2\text{SO}_4$  electrolyte with 50 mM  $\text{KNO}_2$  at different potentials.

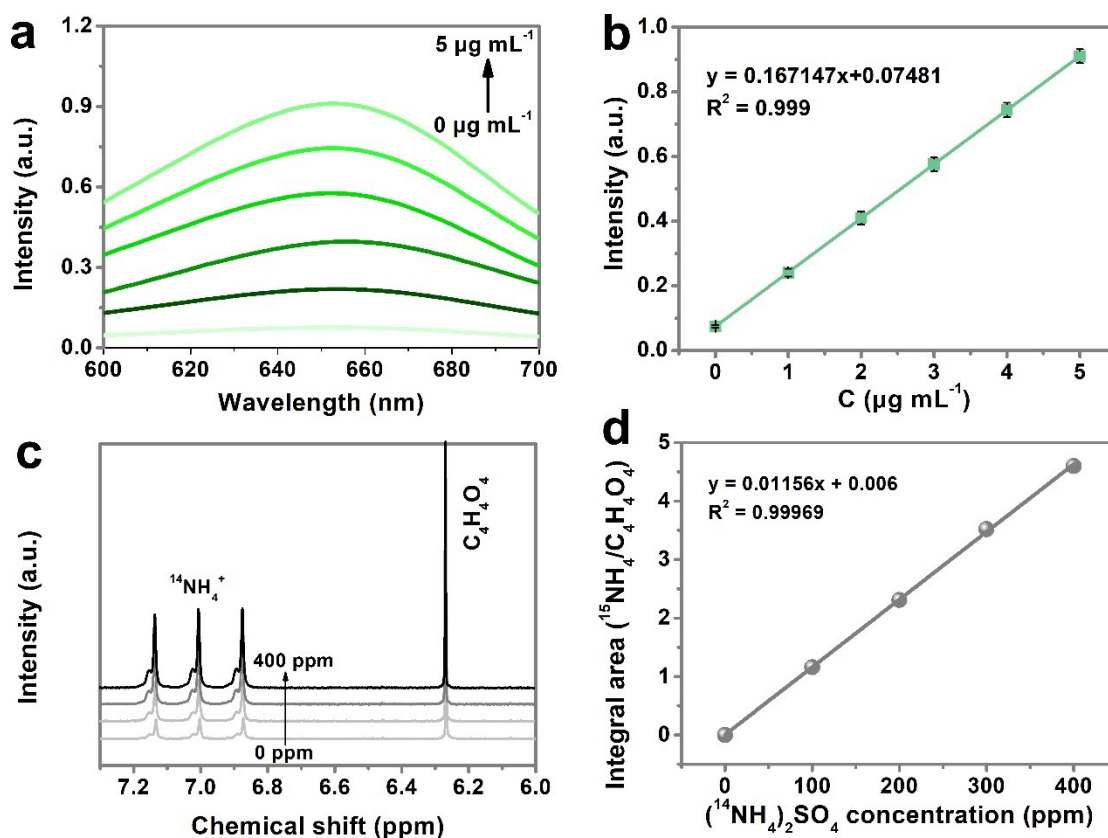

**Fig. S13.** (a) The UV-Vis adsorption curves and (b) calibration curve of the electrolyte with the given concentrations of  $(\text{NH}_4)_2\text{SO}_4$ . (c)  $^1\text{H}$  NMR spectra of standard sample  $(\text{NH}_4)_2\text{SO}_4$  solution with different concentrations. (d) Calibration curve of the electrolyte with the given concentrations of  $(\text{NH}_4)_2\text{SO}_4$ .

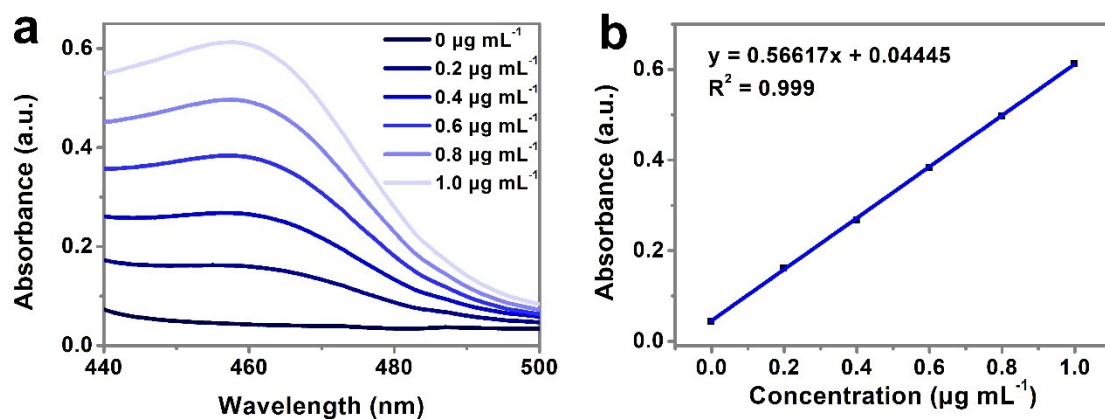

**Fig. S14.** (a) The UV-Vis adsorption curves and (b) Calibration curve of the electrolyte with the given concentrations of  $N_2H_4$ .

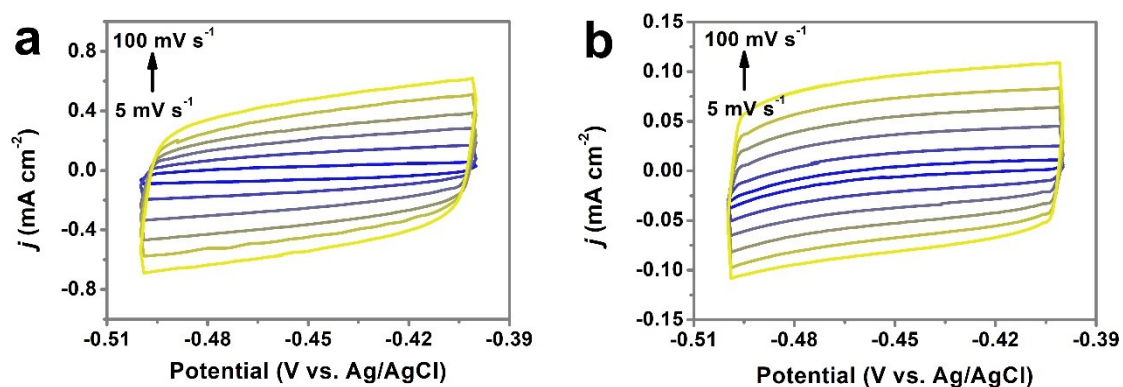

**Fig. S15.** The cyclic voltammetry profiles obtained on the (a)  $Co_3O_4$  and (b)  $C/Co_3O_4$  at the sweep rates of 5, 20, 40, 60, 80 and 100  $mV s^{-1}$ .

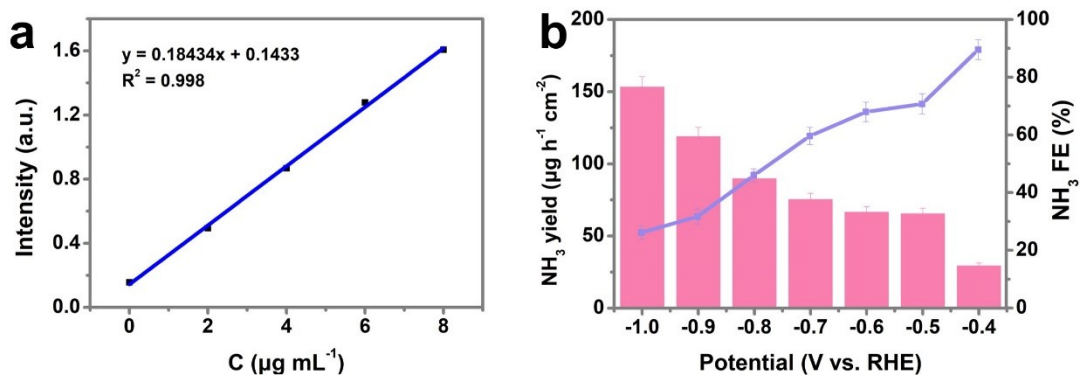

**Fig. S16.** Calibration curve in NH<sub>3</sub> measurement with different (NH<sub>4</sub>)<sub>2</sub>SO<sub>4</sub> concentration. (b) NH<sub>3</sub> yield and the corresponding FE of the C/Co<sub>3</sub>O<sub>4</sub> catalyst for the NO<sub>2</sub><sup>-</sup>RR in 0.5 M K<sub>2</sub>SO<sub>4</sub> + 200 ppm NO<sub>2</sub><sup>-</sup>.

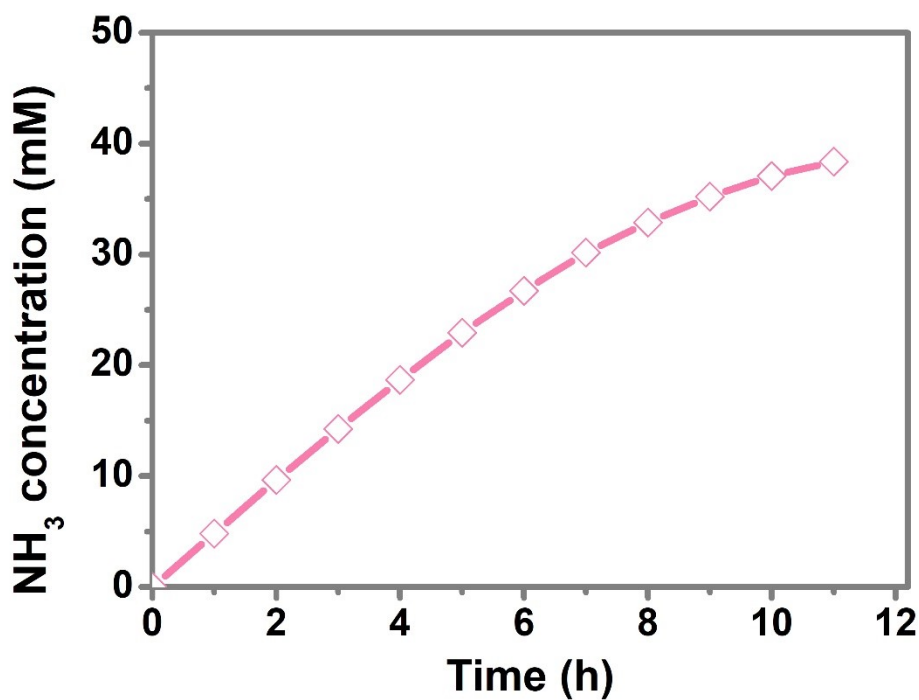

**Fig. S17.** The NH<sub>3</sub> concentration of the electrolyte after consecutive 12-h electrolysis.

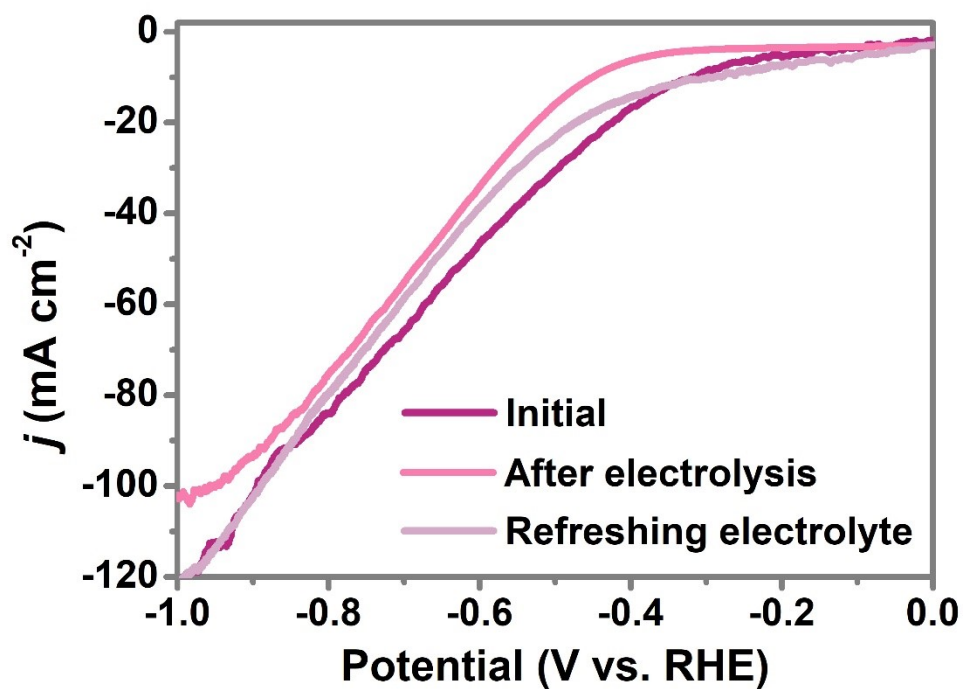

**Fig. S18.** LSV curves of the C/Co<sub>3</sub>O<sub>4</sub> under different test conditions.

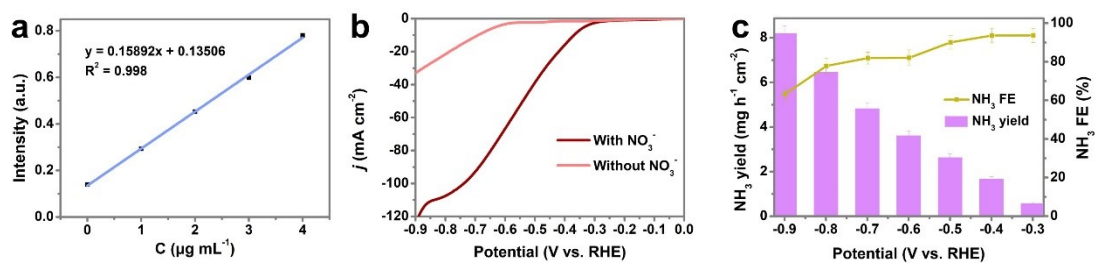

**Fig. S19.** (a) Calibration curve in NH<sub>3</sub> measurement with different (NH<sub>4</sub>)<sub>2</sub>SO<sub>4</sub>. (b) Polarization curves of the C/Co<sub>3</sub>O<sub>4</sub> in 0.5 M K<sub>2</sub>SO<sub>4</sub> electrolyte with or without 50 mM NO<sub>3</sub><sup>-</sup>. (c) NH<sub>3</sub> yield and NH<sub>3</sub> FE of the C/Co<sub>3</sub>O<sub>4</sub> in 0.5 M K<sub>2</sub>SO<sub>4</sub> with 50 mM NO<sub>3</sub><sup>-</sup> electrolyte.

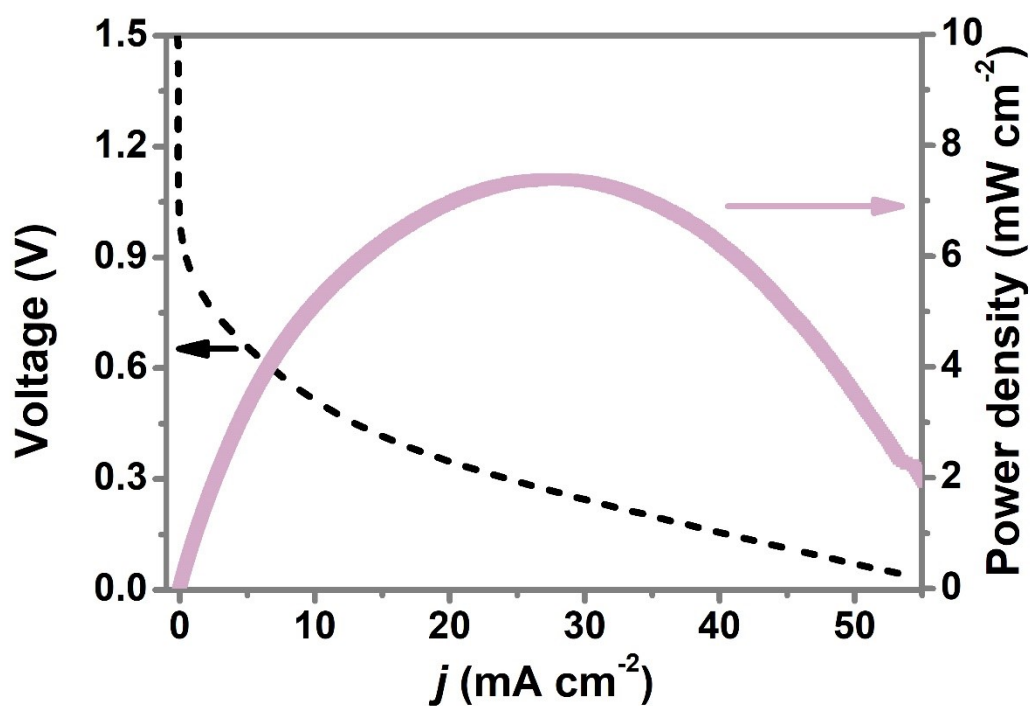

**Fig. S20.** Discharge polarization curves and the corresponding power density of the C/Co<sub>3</sub>O<sub>4</sub>-based Zn-NO<sub>2</sub><sup>-</sup> battery with a Nafion 117 membrane.

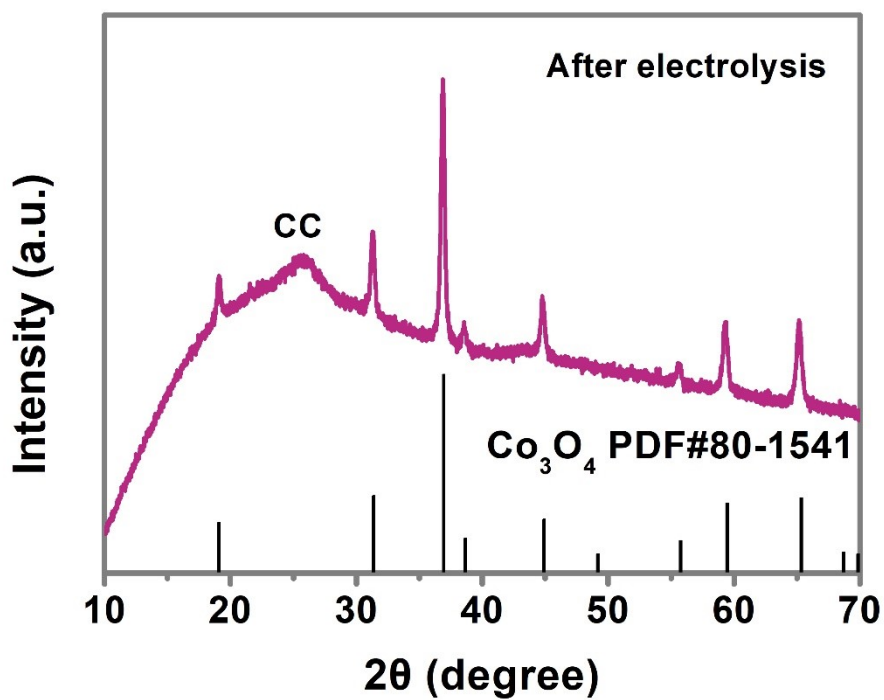

**Fig. S21.** XRD pattern of the C/Co<sub>3</sub>O<sub>4</sub> after stability operation.

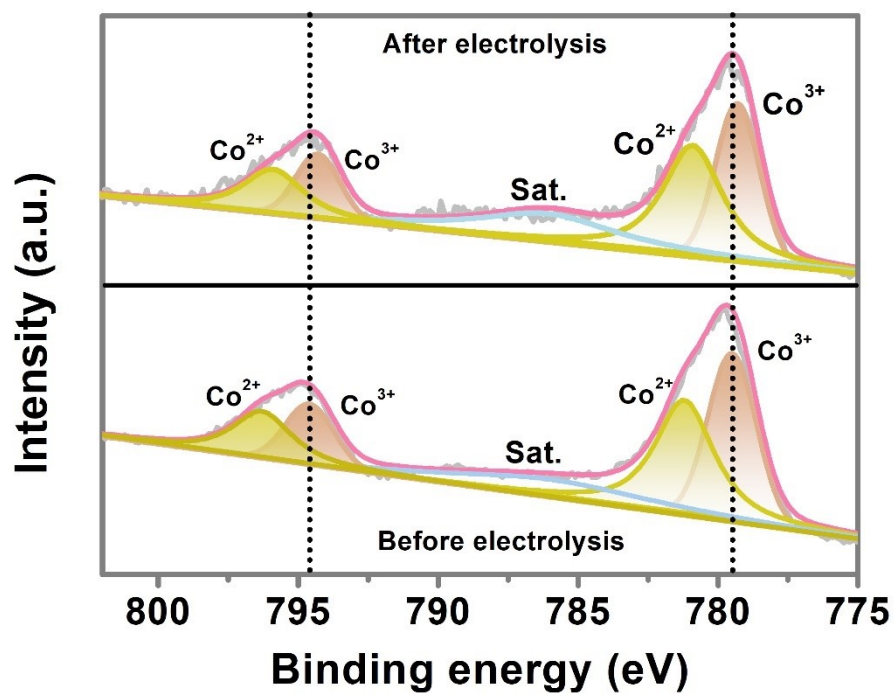

**Fig. S22.** XPS spectra of the C/Co<sub>3</sub>O<sub>4</sub> in the Co 2p region before and after stability operation.

## Supporting Information

**Table S1.** The comparison of NH<sub>3</sub> synthesis performance of NRR electrocatalysts and C/Co<sub>3</sub>O<sub>4</sub>.

| Reactions           | Catalysts                                | NH <sub>3</sub> FE (%) | NH <sub>3</sub> Yield (mg·cm <sup>-2</sup> ·h <sup>-1</sup> ) | Ref.      |
|---------------------|------------------------------------------|------------------------|---------------------------------------------------------------|-----------|
| NRR                 | B <sub>4</sub> C                         | 15.95                  | 25.67                                                         | [1]       |
|                     | W <sub>18</sub> O <sub>49</sub> -16Fe    | 20                     | 24.7                                                          | [2]       |
|                     | Cu-TiO <sub>2</sub>                      | 21.99                  | 21.31                                                         | [3]       |
|                     | SA Ru-Mo <sub>2</sub> CT <sub>x</sub>    | 25.77                  | 40.57                                                         | [4]       |
|                     | CoPc NTs                                 | 27.7                   | 107.9                                                         | [5]       |
|                     | Ru SAs/N-C                               | 29.6                   | 120.9                                                         | [6]       |
|                     | Au nanocages                             | 30.2                   | 2.3                                                           | [7]       |
|                     | CNT@C <sub>3</sub> N <sub>4</sub> -Fe&Cu | 34                     | 5.75                                                          | [8]       |
|                     | Pd cubes                                 | 36.6                   | 24.3                                                          | [9]       |
|                     | RuFeCoNiCu/C                             | 38.5                   | 57.1                                                          | [10]      |
|                     | PdH                                      | 43.6                   | 0.0204                                                        | [11]      |
|                     | Single Fe/N-C                            | 56.55                  | 7.48                                                          | [12]      |
|                     | CN/C600                                  | 62.1                   | 1.7                                                           | [13]      |
| NO <sub>2</sub> -RR | C/Co <sub>3</sub> O <sub>4</sub>         | 100                    | 4.175                                                         | This work |

## Supporting Information

**Table S2.** The comparison of  $\text{NH}_3$  synthesis performance of  $\text{NO}_3^-$ -RR electrocatalysts and  $\text{C}/\text{Co}_3\text{O}_4$ .

| Reaction            | Catalysts                            | $\text{NH}_3$ FE (%) | $\text{NH}_3$ Yield ( $\text{mg}\cdot\text{cm}^{-2}\cdot\text{h}^{-1}$ ) | Ref.             |
|---------------------|--------------------------------------|----------------------|--------------------------------------------------------------------------|------------------|
|                     | CBTDA/Ag-Pd                          | 90                   | 0.006                                                                    | [14]             |
| $\text{NO}_3^-$ -RR | Cu/Cu <sub>2</sub> O NWAs            | 81.2                 | 0.1633                                                                   | [15]             |
|                     | Co <sub>3</sub> O <sub>4</sub> /Ti   | 80                   | 0.634                                                                    | [16]             |
|                     | TiO <sub>2-x</sub>                   | 85                   | 0.765                                                                    | [17]             |
|                     | Cu@Cu <sub>2+1</sub> O NWs           | 87.07                | 0.57653                                                                  | [18]             |
|                     | Pd/TiO <sub>2</sub>                  | 92.1                 | 1.12                                                                     | [19]             |
|                     | Fe SAC                               | 75                   | ~1.955                                                                   | [20]             |
|                     | Ti                                   | 82                   | 1.58                                                                     | [21]             |
|                     | OD-Ag                                | 89                   | ~1.25                                                                    | [22]             |
|                     | CoP PANSs                            | 94                   | 2.2                                                                      | [23]             |
|                     | Fe-PPy SACs                          | 100                  | 2.75                                                                     | [24]             |
|                     | Co/CoO NSAs                          | 91.2                 | 3.298                                                                    | [25]             |
|                     | Cu/Cu-Mn <sub>3</sub> O <sub>4</sub> | 87.6                 | 3.57                                                                     | [26]             |
|                     | Cu@Th-BPYDC                          | 92.5                 | 3.83                                                                     | [27]             |
| $\text{NO}_2^-$ -RR | <b>C/Co<sub>3</sub>O<sub>4</sub></b> | <b>100</b>           | <b>4.175</b>                                                             | <b>This work</b> |

## Supporting Information

|                            |                                      |             |              |                  |
|----------------------------|--------------------------------------|-------------|--------------|------------------|
|                            | Ni-NSA- $V_{Ni}$                     | 89          | 0.236        | [29]             |
|                            | $Cu_3P$ NA/CF                        | 91.2        | 1.626        | [30]             |
|                            | CoP nanoarray                        | 90          | 2.26         | [31]             |
|                            | $Ni_2P/NF$                           | 90.2        | 2.6922       | [32]             |
|                            | Co@JDC                               | 96.9        | 47.6         | [33]             |
|                            | FeOOH NTA/CC                         | 94.7        | 11.937       | [34]             |
| NOR+NO <sub>x</sub> R<br>R | Co SAs/N-C                           | 100         | 1.43         | [35]             |
|                            | $Ni_3B@NiB_{2.74}$                   | 100         | 3.371        | [36]             |
| NORR                       | MoS <sub>2</sub> nanosheet           | 76.6        | 1.69         | [37]             |
|                            | $Ru_{0.05}Cu_{0.95}$                 | 64.9        | 0.3          | [38]             |
|                            | Single atom Nb                       | 77.1        | 5.018        | [39]             |
|                            | FeNC                                 | 5.1         | 0.343        | [40]             |
|                            | Cu foil                              | 61.9        | 1.69         | [41]             |
| <b>NO<sub>2</sub>-RR</b>   | <b>C/Co<sub>3</sub>O<sub>4</sub></b> | <b>99.5</b> | <b>4.175</b> | <b>This work</b> |

**Table S3.** The comparison of NH<sub>3</sub> synthesis performance of NO<sub>2</sub>-RR, NOR+NO<sub>x</sub>RR and NORR electrocatalysts with C/Co<sub>3</sub>O<sub>4</sub>.

## Supporting Information

**Table S4.** The comparison of NH<sub>3</sub> synthesis performance of NORR electrocatalysts and C/Co<sub>3</sub>O<sub>4</sub>.

| Batteries                            | Cathode                              | OCV (V)     | FE(%)       | NH <sub>3</sub> Yield (mg·cm <sup>-2</sup> ·h <sup>-1</sup> ) | Power density (mW cm <sup>-2</sup> ) | Ref.             |
|--------------------------------------|--------------------------------------|-------------|-------------|---------------------------------------------------------------|--------------------------------------|------------------|
| Na-N <sub>2</sub>                    | α-MnO <sub>2</sub> nanowire          | -           | 26          | -                                                             | -                                    | [42]             |
| Al-N <sub>2</sub>                    | graphene/Pd                          | -           | 51.2        | 0.01084                                                       | -                                    | [43]             |
| Li-N <sub>2</sub>                    | carbon cloth                         | -           | 59          | -                                                             | -                                    | [44]             |
| Li-N <sub>2</sub>                    | Mo <sub>2</sub> C/NC                 | -           | 87          | -                                                             | -                                    | [45]             |
| Zn-N <sub>2</sub>                    | metallic copper                      | ~0.5        | 59          | -                                                             | 0.0101                               | [46]             |
| Zn-N <sub>2</sub>                    | VN@NSC-900                           | ~0.55       | -           | 0.000172                                                      | 0.01642                              | [47]             |
| Zn-N <sub>2</sub>                    | NbS <sub>2</sub>                     | ~1.3        | -           | 0.0036                                                        | 0.31                                 | [48]             |
| Zn-N <sub>2</sub>                    | CoPi/NPCS                            | ~1.4        | 16.35       | 0.0147                                                        | 0.49                                 | [49]             |
| Zn-N <sub>2</sub>                    | Fe <sub>1.0</sub> HTNs               | ~0.6        | -           | 0.000137                                                      | 0.02765                              | [50]             |
| Zn-N <sub>2</sub>                    | Vs-FePS3 NSs                         | ~1.75       | -           | -                                                             | 2.6                                  | [51]             |
| Zn-N <sub>2</sub>                    | CoPi/HSNPC                           | ~1          | 24.42       | -                                                             | 0.31                                 | [52]             |
| Zn-NO <sub>3</sub> <sup>-</sup>      | Pd/TiO <sub>2</sub>                  | 0.81        | 81.3        | 0.54                                                          | 0.87                                 | [53]             |
| Zn-NO                                | MoS <sub>2</sub> nanosheets          | 2.03        | 85.0        | 0.4118                                                        | 1.04                                 | [54]             |
| <b>Zn-NO<sub>2</sub><sup>-</sup></b> | <b>C/Co<sub>3</sub>O<sub>4</sub></b> | <b>1.45</b> | <b>95.1</b> | <b>0.802</b>                                                  | <b>6.03</b>                          | <b>This work</b> |

- [1] Nat. Commun. 2018,9, 3485.
- [2] Angew. Chem. Int. Ed. 2020, 59, 7356-7361.
- [3] Adv. Mater. 2020, 32, 2000299.
- [4] Adv. Energy Mater. 2020, 10, 2001364.
- [5] ACS Nano 2021, 15, 3, 5230–5239.
- [6] Adv. Mater. 2018, 30, 1803498.
- [7] Nano Energy 2018,49, 316-323.
- [8] Adv. Mater. 2020, 32, 2004382.
- [9] Adv. Energy Mater. 2020, 10, 2002131
- [10]Nat. Commun. 2019, 10, 3898.
- [11]Angew. Chem. Int. Ed. 2019, 58, 18449-18455.
- [12]Nat. Commun. 2019, 10, 341.
- [13]Nano Lett. 2020, 20, 2879–2885.
- [14]Nat. Energy 2020, 5, 605-613.
- [15]Angew. Chem. Int. Ed. 2020, 59, 5350-5354
- [16]Appl.Catal. B-Environ. 2019, 254, 391-402.
- [17]ACS Catal. 2020, 10, 3533-3540.
- [18]Chem. Eng. J. 2021, 426, 130759.
- [19]Energy Environ. Sci. 2021, 14, 3938-3944.
- [20]Nat. Commun. 2021, 12, 1-10.
- [21]ACS Sustainable Chem. Eng. 2020, 8, 7, 2672–2681.
- [22]ACS Catal. 2021, 11, 8431–8442.

- [23]ACS Appl. Mater. Interfaces 2021, 13, 45521–45527.
- [24]Energy Environ. Sci., 2021, 14, 3522-3531.
- [25]Sci. China Chem. 2020, 63, 1469-1476.
- [26]ACS Appl. Mater. Interfaces 2021, 13, 37, 44733–44741
- [27]ACS Cent. Sci. 2021, 7, 6, 1066-1072.
- [28]J. Am. Chem. Soc. 2018, 140, 16888–16892.
- [29]J. Mater. Chem. A, 2021, 9, 239–243.
- [30]Green Chem. 2021, 23, 5487-5493.
- [31]DOI: 10.1007/s12274-021-3583-9.
- [32]J. Colloid Interf. Sci. 2020, 606, 1055-1063.
- [33]J. Mater. Chem. A, 2022, 10, 2842-2848.
- [34]Chem. Commun., 2022, 58, 5160-5163.
- [35]Appl. Catal. B: Environ. 2021, 299, 120667.
- [36]Angew.Chem. Int. Ed. 2021, 60,14131–14137.
- [37]Angew. Chem. Int. Ed. 2021, 60, 25263–25268.
- [38]Sci. China. Chem. 2021, 64, 493–1497.
- [39]Nano Energy 2020, 78, 105321.
- [40]Nat. Commun. 2021, 12, 1856.
- [41]Angew. Chem. Int. Ed. 2020, 59, 9711-9718.
- [42]Energy Storage Mater. 2019, 23, 733–740.
- [43]Energy Environ. Sci., 2020, 13, 2888-2895.
- [44]Chem, 2017, 2, 525-532.

- [45] *Small Methods*, 2019, 3, 1800334.
- [46] *Chem. Commun.*, 2019, 55, 12801-12804.
- [47] *Appl. Catal. B-Environ.* 2021, 280, 119434.
- [48] *Appl. Catal. B-Environ.*, 2020, 270, 118892.
- [49] *ACS Appl. Mater. Interfaces* 2021, 13, 12106–12117.
- [50] *J. Mater. Chem. A* 2021, 9, 4026-4035.
- [51] *Nano Energy* 2021, 81, 105613.
- [52] *J. Mater. Chem. A*, 2021, 9, 11370-11380.
- [53] *Energy Environ. Sci.*, 2021, 14, 3938-3944.
- [54] *Angew. Chem. Int. Ed.* 2021, 22, 25467-25472.
